# Supplementary material for: Nucleation of zeolitic imidazolate frameworks: from molecules to nanoparticles
Source: Royal Society of Chemistry journal article supplement (doi:10.1039/d2nr06521e), 2023-01-01
Supplement: d2nr06521e1.pdf [file d2nr06521e1.pdf]

## Supplementary Information for: Nucleation of Zeolitic Imidazolate Frameworks: from molecules to nanoparticles

*Salvador R.G. Balestra,<sup>1,2</sup> \* Bruno Martínez-Haya,<sup>1</sup> Norge Cruz-Hernández,<sup>3</sup> Dewi W. Lewis,<sup>4</sup> Scott M. Woodley,<sup>4</sup> Rocio Semino,<sup>2,5</sup> Guillaume Maurin,<sup>2</sup> A. Rabdel Ruiz-Salvador,<sup>1</sup> \* and Said Hamad<sup>1</sup> \**

1) *Departamento de Sistemas Físicos, Químicos y Naturales, Universidad Pablo de Olavide, Ctra. Utrera km 1, 41013 Seville, Spain*

*E-mail: [salrodgom@upo.es](mailto:salrodgom@upo.es), [rruisal@upo.es](mailto:rruisal@upo.es), [said@upo.es](mailto:said@upo.es)*

2) *ICGM, Univ. Montpellier, CNRS, ENSCM, Montpellier, France*

3) *Departamento de Física Aplicada I, Escuela Politécnica Superior, Universidad de Sevilla, Sevilla, Spain*

4) *Department of Chemistry, University College London, 20 Gordon St., London, WC1H 0AJ, UK*

5) *Sorbonne Université, CNRS, Physico-chimie des Electrolytes et Nanosystèmes Interfaciaux, PHENIX, F-75005 Paris, France*

## 1. Section S1. Formation free energies of clusters with implicit and explicit solvation

**Table S1.** Formation free energies of small  $Zn_zIm_lA_a$  clusters with various additional species, namely  $H_2O$ , and HIm molecules, and  $NO_3^-$  counterions.

| $z Zn^{2+}$ | $l Im^-$ | $l$<br>H-mIm | $a H_2O$ | $a$<br>$NO_3^-$ | $q$ [e-] | $\Delta g_c^s$ [eV]<br>RwB97X/6-<br>311++G(d,p<br>) |
|-------------|----------|--------------|----------|-----------------|----------|-----------------------------------------------------|
| 1           | 1        |              |          | 1               | 0        | -2.724                                              |
| 1           | 1        |              |          | 2               | -1       | -3.008                                              |
| 1           | 1        |              |          | 3               | -2       | -2.990                                              |
| 1           | 2        |              |          | 1               | -1       | -3.793                                              |
| 1           | 2        |              |          | 2               | -2       | -3.665                                              |
| 1           | 3        |              |          | 1               | -2       | -4.250                                              |
| 1           | 2        | 2            |          |                 | 0        | -11.606                                             |
| 1           | 4        |              |          |                 | 0        | -13.925                                             |
| 2           | 1        |              |          | 6               | -3       | -2.788                                              |
| 2           | 2        |              |          | 5               | -3       | -3.160                                              |
| 2           | 3        |              |          | 4               | -3       | -3.522                                              |
| 2           | 3        |              |          | 4               | -3       | -3.504                                              |
| 0           | 1        |              | 4        |                 | -1       | 0.299 *                                             |
| 1           | 0        |              | 4        |                 | +2       | -0.649                                              |
| 1           | 1        |              | 4        |                 | +1       | -2.055                                              |
| 1           | 2        |              | 4        |                 | 0        | -3.186                                              |
| 1           | 3        |              | 4        |                 | -1       | -4.120                                              |
| 1           | 4        |              | 4        |                 | -2       | -4.749                                              |
| 1           | -        | 4            | -        | -               | -2       | -10.573                                             |
| 1           | -        | -            | -        | 4               | -2       | -2.256                                              |
| 1           | -        | 1            | -        | 3               | -1       | -2.630                                              |
| 1           | 1        | 1            | -        | 2               | -1       | -3.267                                              |
| 1           | 2        | 1            | -        | 1               | -1       | -3.966                                              |
| 1           | -        | 2            | -        | 2               | 0        | -6.324                                              |
| 1           | 1        | 2            | -        | 1               | -1       | -8.202                                              |

\* No division by zero.

## 2. Section S2. Internal and free energies of formation of clusters in vacuo and with implicit solvation.

**Table S2.** Internal ( $U$ ) and free energies of formation per Zn atom, ( $g$ ), of small clusters (from 1 to 4 Zn atoms), both in gas phase ( $g$ ) and using ethanol as implicit solvent ( $s$ ), calculated with wB97X/6-311++G(d,p) calculations. We also report the solvation energy, and the Root-Mean-Square Zn\_01\_imi\_05.xyzDeviation (RMSD) between the superimposed optimized clusters in vacuo and solvated (no hydrogen atoms):

| System, $\Omega$ |               |                | $q [e^-]$ | $\Delta U_{ZPC}^g [eV]$<br>wB97X/6-311++G(d,p) | $\Delta g_c^s [eV]$<br>wB97X/6-311++G(d,p) | $\Delta g_c^s [eV]$<br><i>Cycle</i> | $\sqrt{ \vec{r}^s - \vec{r}^g ^2} [\text{\AA}/\text{atom}]$ |
|------------------|---------------|----------------|-----------|------------------------------------------------|--------------------------------------------|-------------------------------------|-------------------------------------------------------------|
| $z$<br>$Zn^{2+}$ | $l$<br>$Im^-$ | $l$<br>$mIm^-$ |           |                                                |                                            |                                     |                                                             |
| 1                | 1             | -              | 1         | -16.230                                        | -1.943                                     | -2.125                              | 0.0025                                                      |
| 1                | 2             | -              | 0         | -25.270                                        | -3.634                                     | -3.739                              | 0.0564                                                      |
| 1                | 3             | -              | -1        | -28.075                                        | -4.528                                     | -4.408                              | 0.0437                                                      |
| 1                | 4             | -              | -2        | -27.228                                        | -4.759                                     | -4.852                              | 0.0980                                                      |
| 1                | 5             | -              | -3        | -22.561                                        | -4.125                                     | -4.106                              | 0.7601                                                      |
| 1                | 6             | -              | -4        | -15.968                                        | -3.248                                     | -3.395                              | 0.0821                                                      |
| 2                | 1             | -              | 3         | -8.8375                                        | -1.552                                     | -1.582                              | 0.0727                                                      |
| 2                | 2             | -              | 2         | -16.426                                        | -2.476                                     | -2.576                              | 0.0715                                                      |
| 2                | 3             | -              | 1         | -22.669                                        | -3.382                                     | -3.502                              | 0.2829                                                      |
| 2                | 4             | -              | 0         | -25.730                                        | -3.864                                     | -3.953                              | 0.5060                                                      |
| 2                | 5             | -              | -1        | -27.561                                        | -4.289                                     | -4.320                              | 0.5143                                                      |
| 2                | 6             | -              | -2        | -27.511                                        | -4.610                                     | -4.580                              | 0.0111                                                      |
| 2                | 7             | -              | -3        | -26.522                                        | -4.716                                     | -4.770                              | 0.3849                                                      |
| 4                | 4             | -              | 4         | -23.670                                        | -2.873                                     | -2.971                              | 0.0026                                                      |
| 1                | -             | 1              | 1         | -16.763 *                                      | -1.966                                     | -2.184                              | 0.1989                                                      |
| 1                | -             | 2              | 0         | -25.325                                        | -3.528                                     | -3.766                              | 0.2443                                                      |
| 1                | -             | 3              | -1        | -27.929                                        | -4.508                                     | -4.383                              | 0.0376                                                      |
| 1                | -             | 4              | -2        | -26.875                                        | -4.855                                     | -4.555                              | 0.0654                                                      |
| 2                | -             | 5              | -1        | -27.413                                        | -4.336                                     | -4.238                              | 0.7074                                                      |
| 2                | -             | 7              | -3        | -26.435                                        | -4.803                                     | -4.680                              | 0.2754                                                      |
| 4                | -             | 4              | 4         | -16.802                                        | -2.849                                     | -3.024                              | 0.272                                                       |

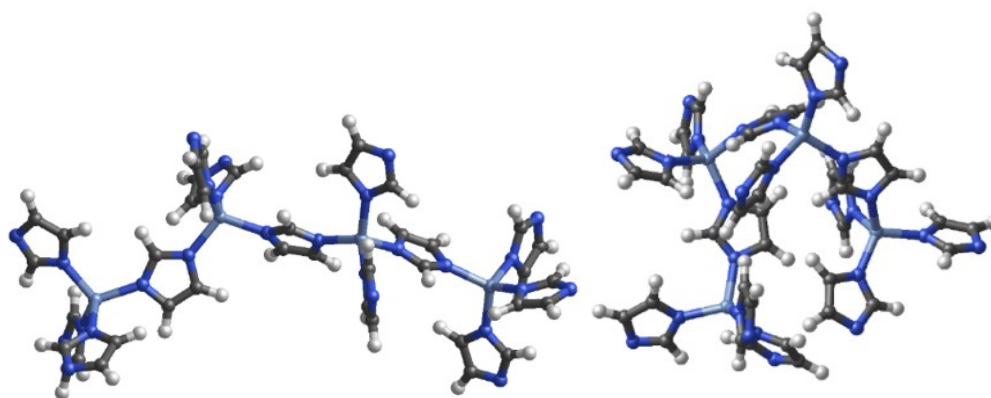

**Figure S1.** Open versus folded configurations for the  $Zn_4Im_{13}$  cluster, obtained from optimization in vacuo (left) and in implicit ethanol (right).

### 3. Section S3. Stability of bulk-like, ring clusters.

**Table S3.** Formation free energies per Zn atom,  $\Delta g_c^s$ , of Im-bearing clusters, calculated using ethanol as implicit solvent at levels wB97X/6-311++G(d,p) and GFN2-xTB.

| <i>Label</i><br>(when necessary)   | $z$<br>$Zn^{2+}$ | $l$<br>$Im^-$ | $q$ [ $e^-$ ] | $\Delta g_c^s$ [eV]<br>wB97X/6-<br>311++G(d,p) | Thermo.<br>Cycle | $\Delta g_c^s$ [eV]<br>GFN2-xTB |
|------------------------------------|------------------|---------------|---------------|------------------------------------------------|------------------|---------------------------------|
| Zn – Im bond                       | 1                | 1             | 1             | -1.943                                         | -2.125           | -32.651                         |
|                                    | 1                | 2             | 0             | -3.635                                         | -3.739           | -36.116                         |
| Trigonal Zn                        | 1                | 3             | -1            | -4.528                                         | -4.408           | -38.359                         |
| <b>1FCZ</b>                        | 1                | 4             | -2            | <b>-4.759</b>                                  | <b>-4.852</b>    | <b>-39.653</b>                  |
| PentaCoordinated Zn                | 1                | 5             | -3            | -4.125                                         | -4.106           | -39.602                         |
| Octahedral Zn                      | 1                | 6             | -4            | -3.248                                         | -3.395           | -39.280                         |
|                                    | 2                | 1             | 3             | -1.552                                         | -1.582           | -29.758                         |
|                                    | 2                | 2             | 2             | -2.477                                         | -2.576           | -33.381                         |
|                                    | 2                | 3             | 1             | -3.382                                         | -3.502           | -35.420                         |
|                                    | 2                | 4             | 0             | -3.864                                         | -3.953           | -36.737                         |
| $\pi$ - $\pi$                      | 2                | 5             | -1            | -4.107                                         | -4.121           | -38.329                         |
| Planar configuration               | 2                | 5             | -1            | -4.290                                         | -4.320           | -38.019                         |
| 1 Trigonal & 1<br>Tetrahedral Zn's | 2                | 6             | -2            | -4.612                                         | -4.580           | -38.737                         |
| Eclipsed 2FCZs                     | 2                | 7             | -3            | -4.679                                         | -4.708           | -39.451                         |
| Staggered 2FCZs                    | 2                | 7             | -3            | <b>-4.716</b>                                  | <b>-4.770</b>    | <b>-39.450</b>                  |
| 3MR (anti-parallel)                | 3                | 3             | 3             | -2.750                                         | <b>-2.831</b>    | <b>-34.290</b>                  |
| Linear                             | 3                | 3             | 3             | -2.616                                         | -2.722           | -33.735                         |
| 3MR (parallel)                     | 3                | 3             | 3             | <b>-2.752</b>                                  | -2.865           | -34.319                         |
|                                    | 3                | 4             | 2             | -3.260                                         | -3.381           | -35.104                         |
|                                    | 3                | 5             | 1             | -3.523                                         | -3.631           | -36.542                         |
|                                    | 3                | 6             | 0             | -4.159                                         | -4.213           | -37.676                         |
|                                    | 3                | 7             | -1            | -4.223                                         | -4.247           | -37.862                         |
| <b>sFCZs</b>                       | 3                | 10            | -4            | <b>-4.799</b>                                  | <b>-9.834</b>    | <b>-39.338</b>                  |
| 4MR (undercoordinated)             | 4                | 4             | 4             | -2.873                                         | -2.971           | -34.437                         |
| 4MR (3 Bi 1 Tri)                   | 4                | 5             | 3             | -3.224                                         | -3.346           | -35.329                         |
| 4MR (3 Bi 1 Tetra)                 | 4                | 6             | 2             | -3.460                                         | -3.726           | -36.159                         |
| 4MR (2 Bi 2 Tri)                   | 4                | 6             | 2             | -3.617                                         | -3.710           | -35.886                         |
| 4MR (1 Bi 3 Tri)                   | 4                | 7             | 1             | <b>-3.895</b>                                  | <b>-4.002</b>    | <b>-36.926</b>                  |
| 4MR-SOD                            | 4                | 12            | -4            | -4.693                                         | <b>-4.732</b>    | <b>-39.355</b>                  |
| <b>4MR-zni</b>                     | 4                | 12            | -4            | <b>-4.740</b>                                  | -4.736           | -39.336                         |
| <b>4FCZs</b>                       | 4                | 13            | -5            | -4.535                                         | -4.265           | -39.397                         |
| <i>Hyper</i> tetrahedron           | 5                | 4             | 6             | -2.040                                         | -2.166           | -32.629                         |
| Flat configuration                 | 5                | 10            | 0             | -4.168                                         | -4.001           | -37.658                         |
| 6MR (undercoordinated)             | 6                | 6             | 6             | -2.938                                         | -2.994           | -34.428                         |
| 4MR-4MR                            | 6                | 12            | 0             | -4.258                                         | <b>-4.300</b>    | <b>-37.651</b>                  |
| 6MR (undercoordinated)             | 6                | 12            | 0             | <b>-4.290</b>                                  | -4.331           | -37.884                         |
| <b>6MR (fully coordinated)</b>     | 6                | 18            | -6            | <b>-4.6187</b>                                 | -4.541           | -39.371                         |

**Table S4.** Formation free energies per Zn atoms,  $\Delta g_c^s$ , of mIm-bearing clusters, calculated using ethanol as implicit solvent at levels wB97X/6-311++G(d,p) (thermodynamic cycle) and GFN2-xTB.

| Label<br>(when necessary)    | $z$<br>$Zn^{2+}$ | $l$<br>$mIm^-$ | $q$ [<br>$e^-$ ] | $\Delta g_c^s$ [eV]<br>wB97X/6-<br>311++G(d,p) | $\Delta g_c^s$ [eV]<br>GFN2-xTB |
|------------------------------|------------------|----------------|------------------|------------------------------------------------|---------------------------------|
|                              | 1                | 1              | 1                | -2.184                                         | -33.108                         |
|                              | 1                | 2              | 0                | -3.766                                         | -33.700                         |
|                              | 1                | 3              | -1               | -4.383                                         | -35.596                         |
| 1FCZ*<br>(Tetrahedron)       | 1                | 4              | -2               | <b>-4.555</b>                                  | <b>-36.390</b>                  |
|                              | 2                | 1              | 3                | -1.583                                         | -28.166                         |
|                              | 2                | 2              | 2                | -2.476                                         | -34.001                         |
|                              | 2                | 3              | 1                | -3.510                                         | -36.046                         |
| $\pi$ - $\pi$                | 2                | 5              | -1               | -4.238                                         | -38.415                         |
|                              | 2                | 5              | -1               | -4.336                                         | -38.436                         |
|                              | 2                | 6              | -2               | -4.534                                         | -38.666                         |
| 2FCZs* (Eclipsed)            | 2                | 7              | -3               | <b>-4.804</b>                                  | <b>-39.902</b>                  |
| Linear                       | 3                | 3              | 3                | -2.758                                         | -34.394                         |
| S3R                          | 3                | 3              | 3                | -2.897                                         | -34.851                         |
|                              | 3                | 4              | 2                | -3.415                                         | -35.857                         |
|                              | 3                | 5              | 1                | -3.573                                         | -37.072                         |
| S4R (cycle)                  | 4                | 4              | 4                | -3.024                                         | -35.204                         |
| S4R (full ring, SOD)         | 4                | 12             | -4               | -4.802                                         | -39.853                         |
| S4R (full ring, <i>zni</i> ) | 4                | 12             | -4               | -4.763                                         | -39.799                         |
| 6MR                          | 6                | 18             | -6               | -4.368                                         | -39.511                         |

\* FCZs = Fully Coordinated Zn cations

4. Section S4. Dihedral angles between the four Zn atoms in the 4MR in the zni crystal structure.

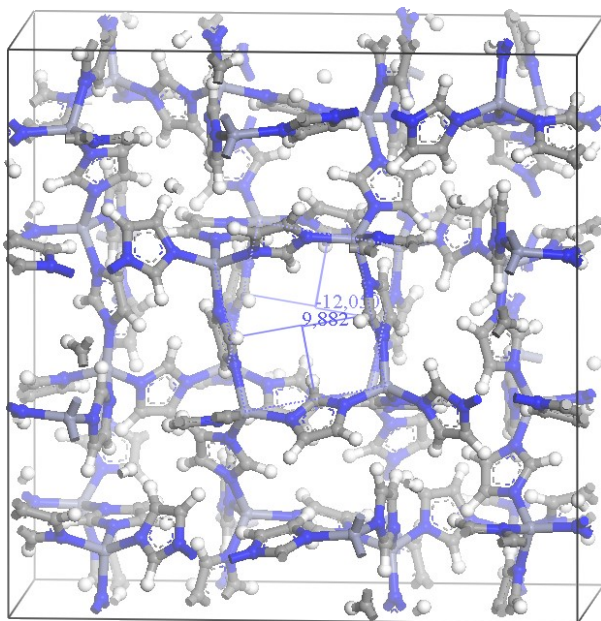

**Figure S2.** Two examples of dihedral angles between four Zn atoms in the 4MR in the zni crystal structure.

**5. Section S5. Formation energies of large clusters, calculated using the linear relation between GFN2-xTB and wB97X/6-311++G(d,p) energies.**

**Table S5.** Formation energies of large clusters, calculated using the linear relation between GFN2-xTB and wB97X/6-311++G(d,p) energies. For clusters whose structures are obtained from crystal building units of ZIFs the label consists in the code of the topology of the ZIF, in italics.

| <i>Label</i>                        | $z$<br>$Zn^{2+}$ | $l$<br>$Im^{-}$ | $l$<br>$mIm^{-}$ | $q$ [ $e^{-}$ ] | $\Delta g_c^s$ [eV]<br>GFN2-xTB/<br>wB97X |
|-------------------------------------|------------------|-----------------|------------------|-----------------|-------------------------------------------|
| <i>lov</i>                          | 5                | 6               | -                | +4              | -3.333                                    |
| <i>nat</i>                          | 6                | 8               | -                | +4              | -3.649                                    |
| D3R                                 | 6                | 9               | -                | +3              | -3.981                                    |
| S6R                                 | 6                | 18              | -                | -6              | -4.722                                    |
| S6R                                 | 6                | -               | 18               | -6              | -4.699                                    |
| D4R                                 | 8                | 20              | -                | -4              | -4.728                                    |
| D4R                                 | 8                | -               | 20               | -4              | -4.656                                    |
| S8R                                 | 8                | 24              | -                | -8              | -4.660                                    |
| S8R                                 | 8                | -               | 24               | -8              | -4.655                                    |
| D6R                                 | 12               | 30              | -                | -6              | -4.712                                    |
| <i>rth</i>                          | 12               | 29              | -                | -5              | -3.525                                    |
| D8R                                 | 16               | 40              | -                | -8              | -4.707                                    |
| <i>mep</i>                          | 20               | 50              | -                | -10             | -4.716                                    |
| <i>sod</i>                          | 24               | 60              | -                | -12             | -3.838                                    |
| <i>sod</i>                          | 24               | -               | 60               | -12             | -3.136                                    |
| <i>Continuos<br/>random network</i> | 41               | 88              | -                | 3               | -5.544                                    |
| <i>zni</i>                          | 60               | 120             | -                | 0               | -5.371                                    |
| <i>SALEM-2</i>                      | 144              | 288             | -                | 0               | -5.490                                    |

**Table S6.** Formation energies of periodic structures, calculated using the linear relation between GFN2-xTB and wB97X/6-311++G(d,p) energies.

| <i>Label</i> | $z$<br>$Zn^{2+}$ | $\Delta g_c^s$ [eV]<br>GFN2-xTB/<br>wB97X |
|--------------|------------------|-------------------------------------------|
| <i>zni</i>   | 32               | -6.187                                    |
| <i>coi</i>   | 16               | -6.031                                    |
| <i>dia</i>   | 16               | -6.035                                    |
| <i>cri</i>   | 8                | -5.972                                    |
| BCT          | 8                | -5.936                                    |
| SOD          | 12               | -5.861                                    |
| GIS          | 16               | -5.972                                    |
| MER          | 32               | -5.905                                    |
